# Supplementary material
Source: PubMed Central journal article supplement (PMC7422125)

Supplemental Figure 1: Regression curve between BM and PB VAF ( $y= 1.023x-0.5878$ ,  $p<0.0001$ )

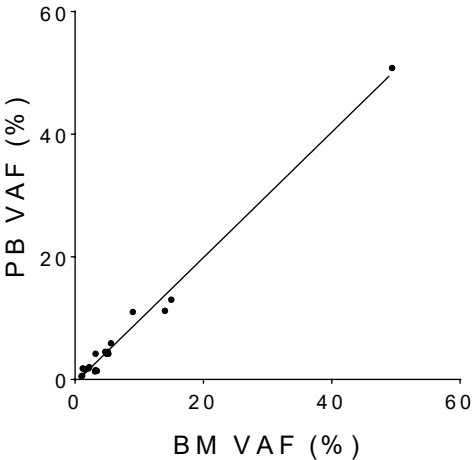

Supplemental Figure 2: Agreement between BM and PB VAF (Bland-Altman plot)

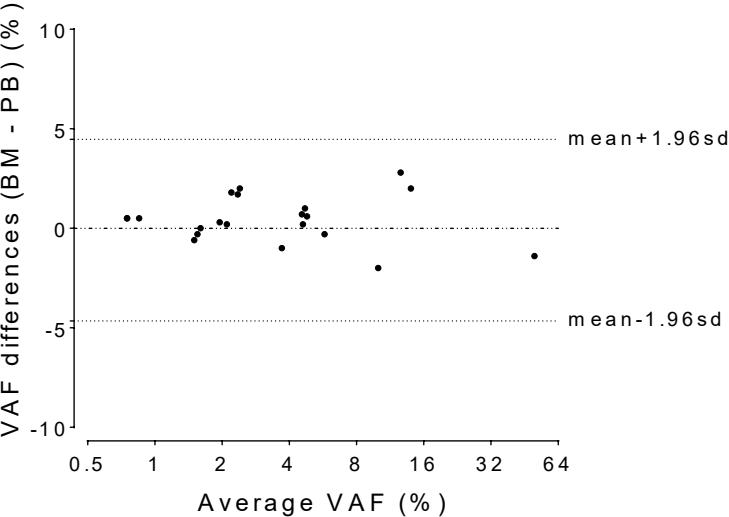

Supplement: advancesADV2020001582-suppl5.pdf [file advancesADV2020001582-suppl5.pdf]
